# Supplementary material
Source: publisher figshare collection journal article supplement (https://gsapubs.figshare.com/ndownloader/files/23297534)
Supplement: Supplementary file 1 [file 23297534]

## Sheet: Sheet1
TABLE DR2. WHOLE-ROCK ANALYSES OF MUSCOVITE-CHLORITOID-FE-CARBONATE SCHISTS OF THE NOME COMPLEX, SEWARD PENINSULA, ALASKA
Sample No.	Deposit	Setting	Location(1)		SiO2	Al2O3	Fe2O3T	MnO	MgO	CaO	Na2O	K2O	TiO2	P2O5	LOI	Total	F	C-Total	C-Graphitic	C-Organic	TOC	CO2	Total S	SO4	Be	V	Cr	Sc	Ni	Co	Cu	Zn	Ag	Pb	Hg	Au	As	Se	Sb	Ga	Ge	Rb	Sr	Zr	Nb	Mo	Sn	Cs	Ba
			Latitude	Longitude	wt %	wt %	wt %	wt %	wt %	wt %	wt %	wt %	wt %	wt %	wt %	wt %	wt %	wt %	wt %	wt %	wt %	wt %	wt %	wt %	ppm	ppm	ppm	ppm	ppm	ppm	ppm	ppm	ppm	ppm	ppb	ppb	ppm	ppm	ppm	ppm	ppm	ppm	ppm	ppm	ppm	ppm	ppm	ppm	ppm
JS-07-1E	Quarry	Quarry	64 42.18	165 46.08	60.5	12.51	5.05	0.074	0.7	8.51	0.13	3.09	0.931	0.16	8.65	100.3	0.21	1.88	< 0.05	0.06	0.06	6.63	< 0.01	< 0.3	2	120	164	12.8	40	10	70	90	2.6	252	61	< 2	3.7	< 3	70.8	16	3.1	176	68	298	12	4	2	63.5	859
JS-07-1F	Quarry	Quarry	64 42.18	165 46.08	53.72	11.8	5.15	0.091	0.83	12.55	0.12	3.41	0.827	0.14	11.62	100.3	0.16	2.79	< 0.05	0.05	0.05	10.2	0.02	< 0.3	2	109	77	11.6	40	15	5	140	1	116	< 5	< 2	3.9	< 3	38.1	16	1.6	199	136	265	11.3	< 2	3	50.9	1413
JS-07-1G	Quarry	Quarry	64 42.18	165 46.08	49.98	9.68	3.84	0.072	0.65	17.91	0.06	2.31	0.653	0.11	15.53	100.8	0.13	4.05	< 0.05	< 0.05	< 0.05	15	0.01	< 0.3	2	90	98	9.7	20	11	30	40	< 0.5	50	6	< 2	2.7	< 3	16.3	13	1.7	135	165	204	8.8	< 2	2	33.7	602
AC-17-66.5	Aurora Creek	Aurora Creek	64 42.82	165 35.85	64.43	13.57	5.55	0.058	0.87	4.15	0.23	2.93	0.862	0.11	6.14	98.9	0.05	1.26	< 0.05	0.15	0.15	4	0.19	0.4	2	116	80	11.2	40	15	160	460	1.4	37	n.a.	9	2.7	< 3	7.1	17	3.6	157	121	322	17	50	3	21.9	2150
JS-05-67	Aurora Creek	Christophosen	64 42.05	165 34.90	75.83	11.33	4.75	0.057	0.51	0.93	0.2	3.26	0.744	0.14	2.58	100.3	0.09	0.19	< 0.05	< 0.05	< 0.05	0.63	0.03	< 0.3	2	113	84	11.7	49	12	5	34	< 0.3	19	< 5	4	< 0.5	< 3	3.2	15	3.2	165	45	212	11.2	< 2	5	15	1301
JS-07-4A	Aurora Creek	Christophosen	64 42.11	165 35.06	79.3	8.61	4.77	0.023	0.67	0.17	0.1	2.31	0.476	0.12	1.95	98.49	0.1	0.04	< 0.05	< 0.05	< 0.05	0.03	0.14	< 0.3	2	189	134	7.5	30	7	20	210	< 0.5	24	19	< 2	4.8	< 3	8.7	11	1.5	103	27	111	6	< 2	2	9	2230
JS-07-4B	Aurora Creek	Christophosen	64 42.11	165 35.06	71.97	13.62	5.23	0.04	0.94	0.13	0.16	4.06	0.72	0.12	2.75	99.73	0.12	0.02	< 0.05	< 0.05	< 0.05	0.07	0.33	0.5	3	62	50	11	20	12	30	390	0.7	30	45	< 2	12	< 3	4.2	21	3.8	185	29	285	13	< 2	4	17.8	2536
JS-07-5	Aurora Creek	Christophosen	64 42.08	165 35.06	71.44	12.92	5.7	0.066	0.57	1.51	0.24	3.22	0.767	0.1	3.16	99.7	0.05	0.3	< 0.05	< 0.05	< 0.05	1.06	0.04	< 0.3	2	106	80	12	40	24	200	120	1.2	49	9	15	15	< 3	6.5	20	4.2	169	69	324	12.7	< 2	4	15.7	1346
JS-07-8B	Aurora Creek	Aurora Creek	64 42.99	165 35.99	75	11.65	6.27	0.062	0.4	0.23	0.1	2	0.81	0.11	1.64	98.26	0.05	0.03	< 0.05	< 0.05	< 0.05	0.02	< 0.01	< 0.3	2	101	180	9.9	40	18	5	310	< 0.5	9	< 5	< 2	2.1	< 3	7.7	15	2.4	106	27	215	9.9	< 2	3	15.6	967
JS-07-10	Aurora Creek	Aurora Creek	64 42.99	165 35.93	68.27	13.6	6.17	0.06	1.96	0.66	0.27	3.05	0.868	0.17	3.22	98.29	0.09	0.11	< 0.05	< 0.05	< 0.05	0.34	0.02	< 0.3	2	135	143	12.9	50	16	30	400	< 0.5	29	31	< 2	< 0.5	< 3	6.7	18	1.5	134	58	298	14.5	2	3	11.5	1201
JS-07-11	Aurora Creek	Aurora Creek	64 42.99	165 35.93	75.38	9.99	5.83	0.026	1.26	0.27	0.13	2.59	0.67	0.17	2	98.32	0.08	0.05	0.05	< 0.05	0.05	0.01	0.02	< 0.3	2	91	59	9	30	11	5	90	< 0.5	11	10	< 2	< 0.5	< 3	7.3	13	1.8	111	43	224	10.6	< 2	2	6.7	1305
JS-07-14	Aurora Creek	Aurora Creek	64 42.97	165 35.55	54.96	20.12	10.25	0.313	3.82	0.24	1.45	3.61	1.057	0.12	4.31	100.2	0.09	0.13	0.11	< 0.05	0.11	0.03	< 0.01	< 0.3	3	176	113	20.6	80	44	90	150	< 0.5	37	11	< 2	16.2	< 3	4.9	26	3	142	64	189	15.5	< 2	3	7.2	651
JS-07-24	Aurora Creek	Aurora Creek	64 43.00	165 36.07	71.72	11.63	5.67	0.084	0.51	1.98	0.2	2.68	0.773	0.09	3.08	98.41	0.07	0.45	< 0.05	0.06	0.06	1.46	0.03	< 0.3	2	114	182	11.7	30	16	130	300	< 0.5	10	78	< 2	2.3	< 3	5	14	1.8	144	38	227	11.3	3	3	14.1	1438
JS-07-17E	Wheeler North	Wheeler North	64 58.64	164 38.51	65.92	15.62	7.09	0.062	1.86	0.3	0.22	3.93	0.849	0.18	3.28	99.32	0.06	0.02	< 0.05	< 0.05	< 0.05	0.11	0.04	< 0.3	3	160	90	18	60	19	< 10	170	< 0.5	14	< 5	13	6	< 3	2.5	22	3.1	188	48	206	13.8	< 2	4	12.5	846
JS-07-29	Wheeler North	Wheeler North	64 58.38	164 38.96	68.89	7.27	5.96	0.134	2.3	3.88	0.1	1.91	0.487	0.18	8.52	99.63	0.07	2.27	0.08	0.1	0.18	7.88	0.23	0.6	1	85	132	8.5	30	11	80	560	< 0.5	14	113	46	54.7	< 3	46	10	1.5	83	93	157	6.8	< 2	2	8.3	731
JS-07-30	Wheeler North	Wheeler North	64 58.47	164 38.93	67.1	12.53	6.23	0.079	2.06	2.46	0.26	1.68	0.753	0.16	5.84	99.14	0.05	1.2	< 0.05	0.05	0.05	4.11	0.04	< 0.3	2	124	76	10.5	40	17	70	230	< 0.5	18	38	< 2	1.8	< 3	12.9	17	2.3	72	72	245	12.6	12	3	4.3	577
85ATi77A	Wheeler North	Distal, 0.8 km NE of Wheeler N	64 58.94	164 37.72	64.57	16.27	5.75	0.048	2.21	0.61	0.37	3.74	1.026	0.19	3.49	98.27	0.1	0.16	< 0.05	< 0.05	< 0.05	0.46	< 0.01	< 0.3	3	171	146	20.5	10	12	20	80	< 0.5	8	< 5	< 2	9	< 3	5.7	14	1.5	141	36	271	14.2	< 2	4	19	893
05AD24D	Aurora Creek	Distal, ~2 km S of Christophosen	64 39.47	165 35.31	70.04	12.87	5.39	0.033	1.07	4.98	0.26	1.78	0.724	0.05	2.85	100.1	0.04	0.42	< 0.05	< 0.05	< 0.05	1.43	< 0.01	< 0.3	3	120	132	13.2	10	4	5	15	< 0.5	27	10	< 2	< 0.5	< 3	6.5	11	2.2	62	199	234	30.5	< 2	4	4.9	302
05AD24G	Aurora Creek	Distal, ~2 km S of Christophosen	64 39.47	165 35.31	74.75	11.63	5.44	0.024	0.89	0.28	0.13	2.97	0.745	0.16	1.99	99.01	0.09	0.04	< 0.05	< 0.05	< 0.05	0.1	< 0.01	< 0.3	2	110	98	12.8	60	18	100	60	0.6	< 5	20	13	5	< 3	7.8	15	2.4	139	24	252	12.7	< 2	3	11.4	456
06ATi19C	Wheeler North	Distal, 1 km NW of Wheeler N	64 59.61	164 42.82	67.13	14.45	8.47	0.036	2.12	0.26	0.38	3.24	0.964	0.16	2.99	100.2	0.1	0.05	< 0.05	< 0.05	< 0.05	0.11	< 0.01	< 0.3	3	158	117	17.6	40	17	5	70	< 0.5	6	< 5	< 2	5	< 3	4.6	12	1.3	123	26	210	13	< 2	4	14.8	513
07AD5C	Wheeler North	Distal, 0.5 km SW of Wheeler N.	64 58.47	164 38.93	62.55	13.35	6.07	0.106	2.39	2.54	0.27	2.99	0.81	0.22	7.15	98.46	0.1	1.57	< 0.05	< 0.05	< 0.05	5.51	0.04	< 0.3	3	139	99	16.5	40	16	80	15	< 0.5	< 5	97	13	33	< 3	6.2	17	1.3	139	82	213	12.5	< 2	3	9.9	529
07AD5D	Wheeler North	Distal, 0.2 km SW of Wheeler N.	64 58.61	164 38.68	61.62	15.44	7.24	0.106	2.18	2.21	0.59	3.35	0.984	0.13	5.27	99.12	0.09	0.9	< 0.05	0.06	0.06	3.24	< 0.01	< 0.3	4	151	114	17.6	10	18	5	60	0.8	6	< 5	< 2	5	< 3	1.1	20	1.3	158	102	314	15.5	< 2	3	11.4	650
07ATi4A-F/S	Wheeler North	Distal, 0.8 km NE of Wheeler N	64 43.27	165 34.53	65.22	14.4	6.09	0.057	1.91	1.9	0.22	3.64	0.827	0.16	3.55	97.99	0.1	0.31	< 0.05	< 0.05	< 0.05	1.06	< 0.01	< 0.3	3	124	136	16	20	13	20	60	< 0.5	< 5	5	< 2	8	< 3	4.2	19	1.8	169	143	249	14.4	< 2	3	9.9	830
07ATi4B	Nelson	Distal, 3 km NE of Nelson	64 43.27	165 34.53	62.16	13.33	7.15	0.086	1.58	4.46	0.2	2.88	0.71	0.16	5.35	98.07	0.06	0.94	< 0.05	< 0.05	< 0.05	3.32	< 0.01	< 0.3	2	115	99	8.8	10	12	20	15	< 0.5	< 5	5	< 2	5	< 3	4	15	2	128	212	206	12	< 2	2	7.8	468
07ATi10A	Nelson	Distal, 3 km NE of Nelson	64 58.94	164 37.72	61.58	13.56	6.8	0.087	2.91	2.73	0.22	3.26	0.844	0.19	6.15	98.34	0.1	1.18	< 0.05	0.06	0.06	4.13	0.01	< 0.3	3	139	107	16.8	10	17	30	100	< 0.5	< 5	< 5	8	8	< 3	2.8	19	1.1	152	98	264	14.7	< 2	3	8.5	711
07ATi14	Nelson	Distal, 3 km NE of Nelson	64 47.09	165 21.01	63.05	15.04	7.1	0.095	3.58	0.68	1.71	2.72	0.932	0.19	3.08	98.17	0.07	0.07	< 0.05	< 0.05	< 0.05	0.22	< 0.01	< 0.3	2	125	104	19	10	21	40	50	< 0.5	< 5	< 5	< 2	7	< 3	< 0.2	19	1.2	110	61	227	11.9	< 2	3	3.3	1576
07ATi22E	Aurora Creek	Distal, 1.5 km SSE of Aurora Ck	64 58.79	164 38.06	56.92	19.52	9.28	0.047	2.45	0.39	0.34	4.74	1.055	0.19	4.14	99.07	0.13	0.07	< 0.05	< 0.05	< 0.05	0.19	< 0.01	< 0.3	4	164	125	22.2	10	25	5	130	< 0.5	< 5	< 5	< 2	8	< 3	1.8	27	1.9	251	31	278	19	< 2	4	20.4	815
07ATi31A	Wheeler North	Distal, 1 km NNW of Wheeler N	65 00.14	164 40.59	63.46	15.27	8	0.074	2.12	0.45	0.25	3.55	0.929	0.16	3.37	97.64	0.09	0.1	< 0.05	< 0.05	< 0.05	0.32	< 0.01	< 0.3	3	148	123	18.4	30	21	90	50	< 0.5	< 5	< 5	< 2	8	< 3	0.3	20	2.4	164	45	277	15.4	< 2	3	10.7	700
(1) Location is given in degrees and decimal minutes (NAD 27). Longitude is in degrees west; this number should be expressed as negative in GIS.
[truncated: 22 more columns]
